# Supplementary material for: In-Silico and In-Vitro Analysis of the Novel Hybrid Comprehensive Stage II Operation for Single Ventricle Circulation
Source: MDPI journal article supplement (doi:10.3390/bioengineering10020135), 2023-01-19
Supplement: s1 [file s1]

# Supplementary Material

## In-silico and In-vitro Analysis of the Novel Hybrid Comprehensive Stage II Operation for Single Ventricle Circulation

Arka Das<sup>1\*</sup>, Marwan Hameed<sup>2</sup>, Ray Prather<sup>1,3,4</sup>, Michael Farias<sup>4,5</sup>, Eduardo Divo<sup>1</sup>, Alain Kassab<sup>3</sup>, David Nykanen<sup>4,5</sup>, and William DeCamp<sup>4,5</sup>

<sup>1</sup> Department of Mechanical Engineering, Embry-Riddle Aeronautical University; Daytona Beach, FL 32114, USA

<sup>2</sup> Department of Mechanical Engineering, American University of Bahrain, Bahrain

<sup>3</sup> Department of Mechanical and Aerospace Engineering, University of Central Florida; Orlando, FL 32816, USA

<sup>4</sup> The Heart Center at Orlando Health Arnold Palmer Hospital for Children, Orlando, FL 32806, USA

<sup>5</sup> College of Medicine, University of Central Florida, Orlando, FL 32816, USA

\* Correspondence: [dasa@erau.edu](mailto:dasa@erau.edu); Tel.: +1-386-241-1457

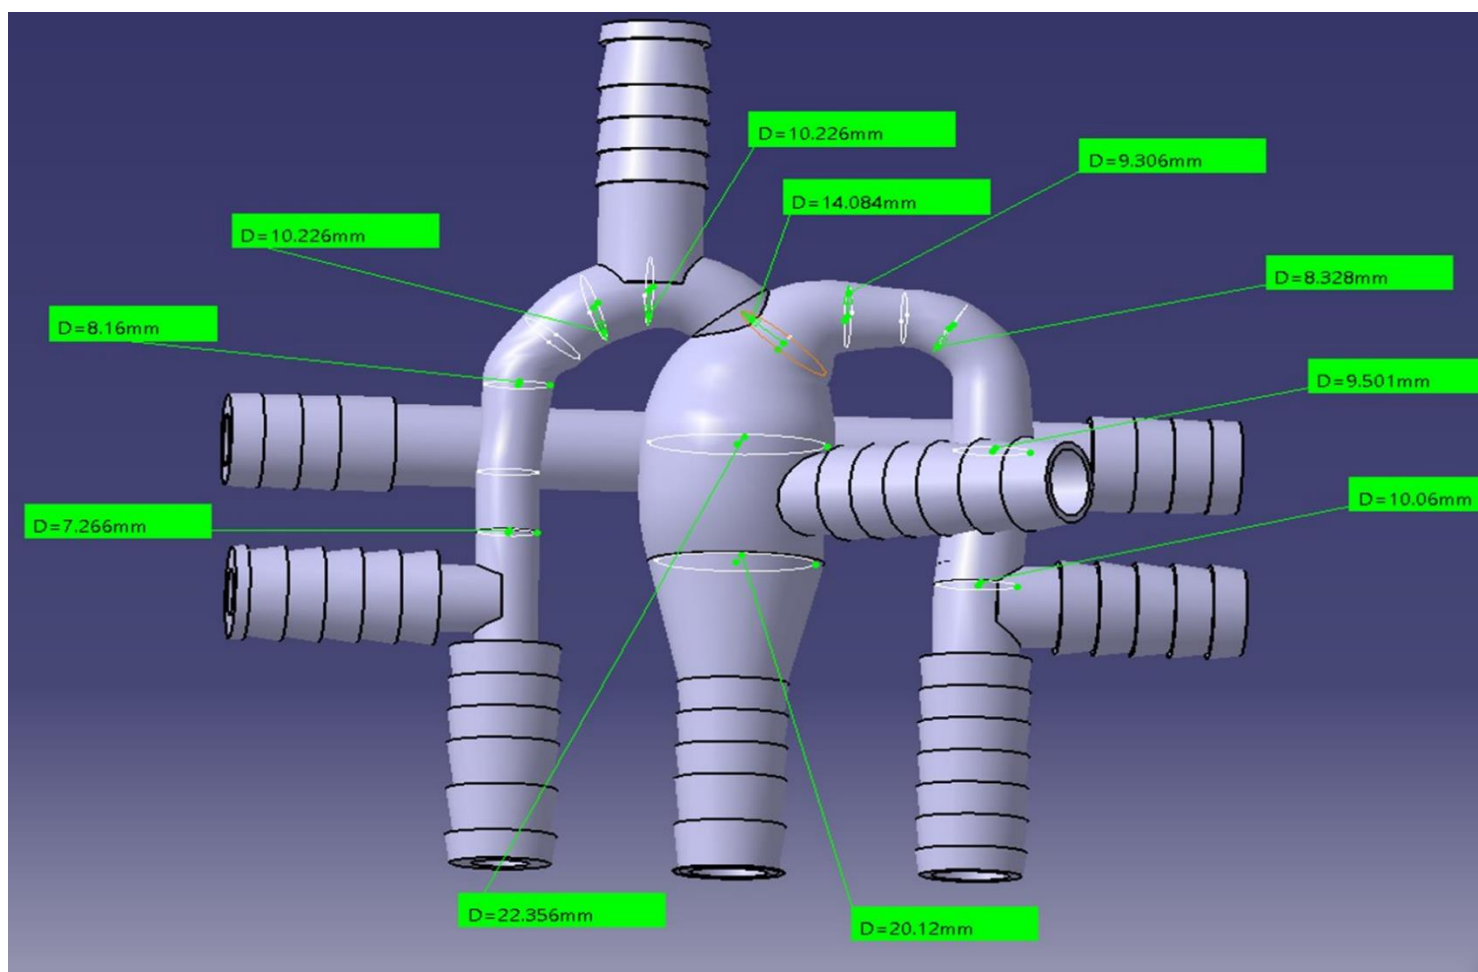

**Figure S1.** - Development of 3D CAD model of HCSII centerpiece from deidentified angiographic images for performing in-vitro studies. Dimension of the 3D phantom with the labeled diameters (in mm) of labeled branches using CATIA v5.

**Table S1.** Statistical analysis using One way ANOVA for in-vitro PRT study of patient 1

| Source of Variation | S.S.     | df | M.S.     | F        | P-value  | F crit   |
|---------------------|----------|----|----------|----------|----------|----------|
| Between Groups      | 0.715123 | 4  | 0.178781 | 0.747943 | 0.566046 | 2.641465 |
| Within Groups       | 8.366052 | 35 | 0.23903  |          |          |          |
| Total               | 9.081175 | 39 |          |          |          |          |

**Table S2.** Statistical analysis using One way ANOVA for in-vitro PRT study of patient 2

| Source of Variation | S.S.     | df | M.S.     | F        | P-value  | F crit   |
|---------------------|----------|----|----------|----------|----------|----------|
| Between Groups      | 0.000556 | 2  | 0.000278 | 0.022839 | 0.977448 | 3.554557 |
| Within Groups       | 0.218958 | 18 | 0.012164 |          |          |          |
| Total               | 0.219513 | 20 |          |          |          |          |

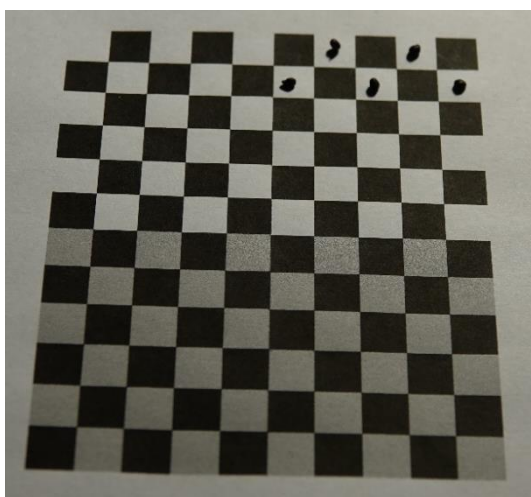

(a)

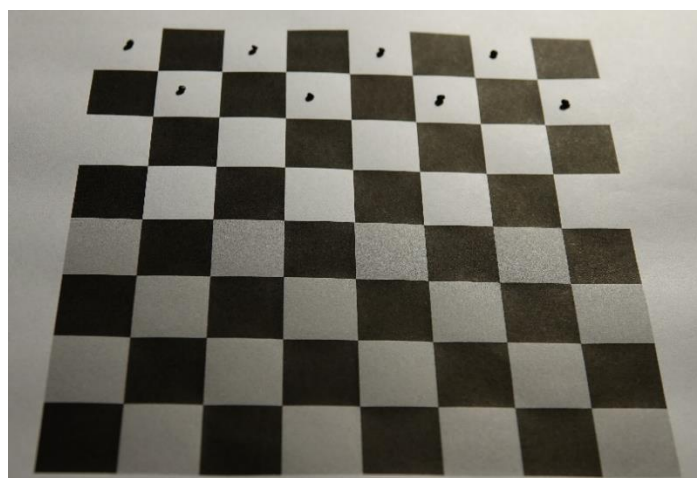

(b)

**Figure S2.** The binary checkerboard patterns used for HS camera calibration purposes in in-vitro PRT study containing (a) 5 x 6 (Binary) and (b) 8 x 8 (binary) patterns.

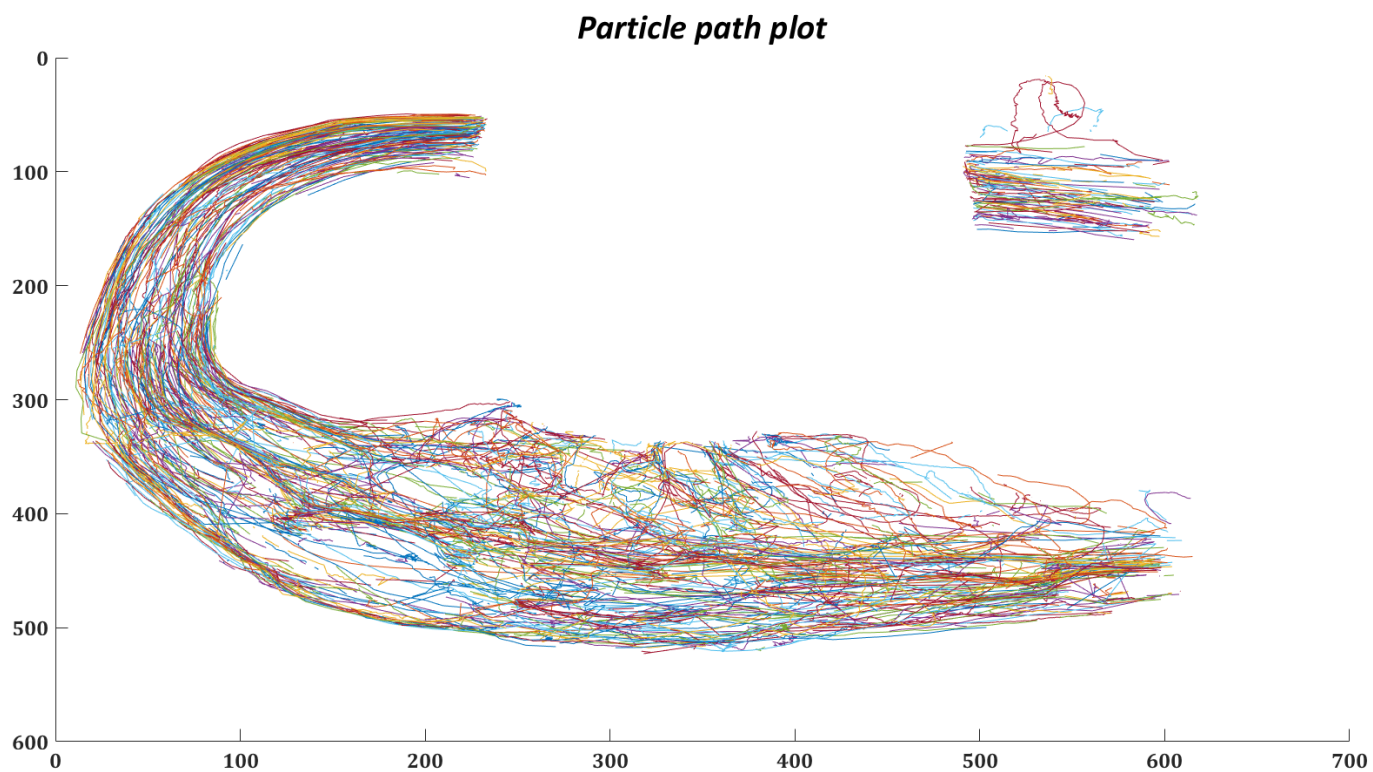

**Figure S3.** – Trajectory plot of tracked particles in the MPA conduit for patient 1 obtained from experimental trial 3.

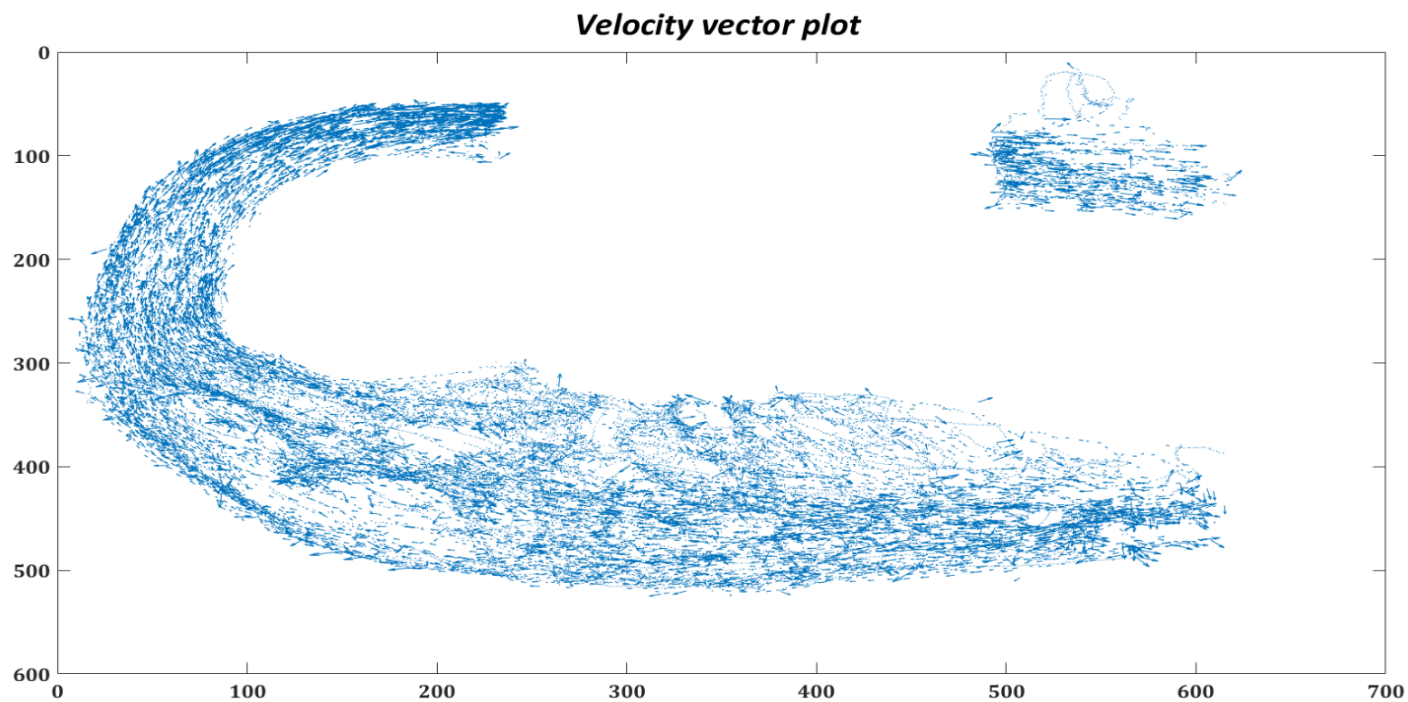

**Figure S4.** – Velocity vector plot of the tracked particles in the MPA conduit for patient 1. obtained from experimental trial 3

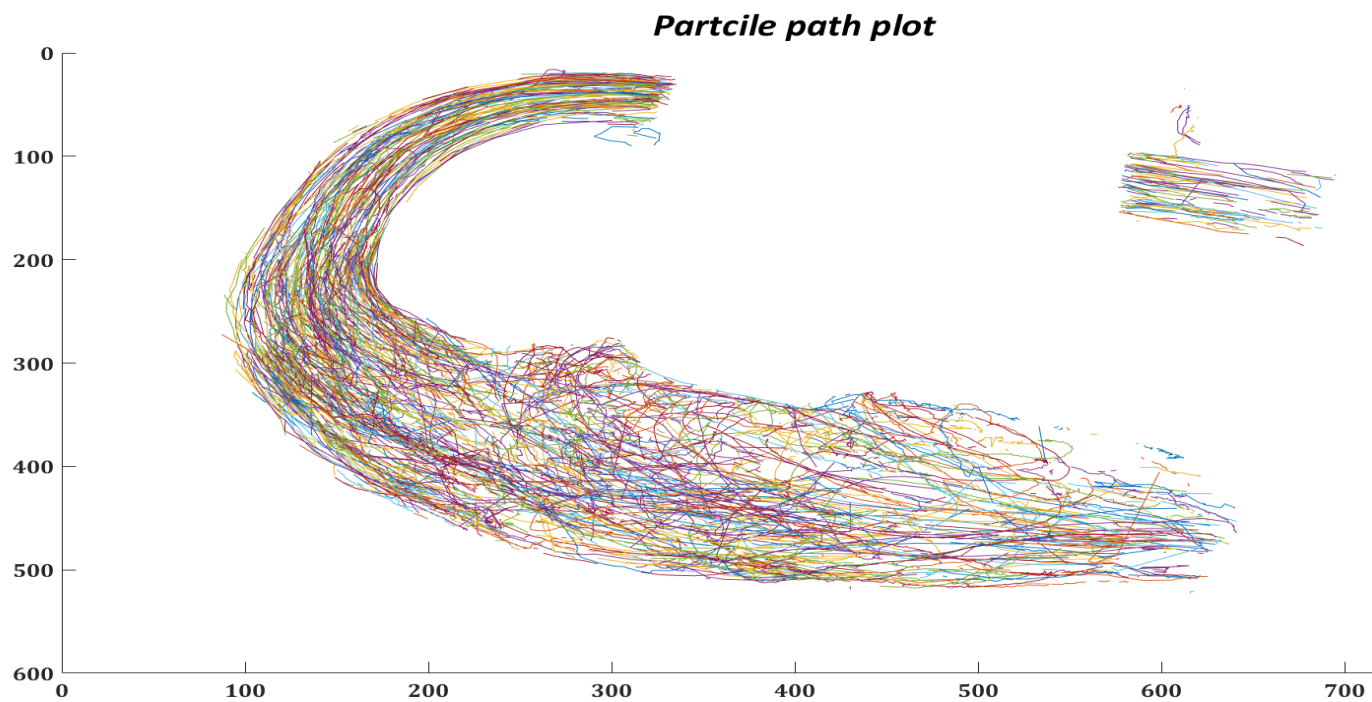

**Figure S5.** – The trajectory plot of tracked particles in the MPA conduit for patient 1 in experimental trial 4.

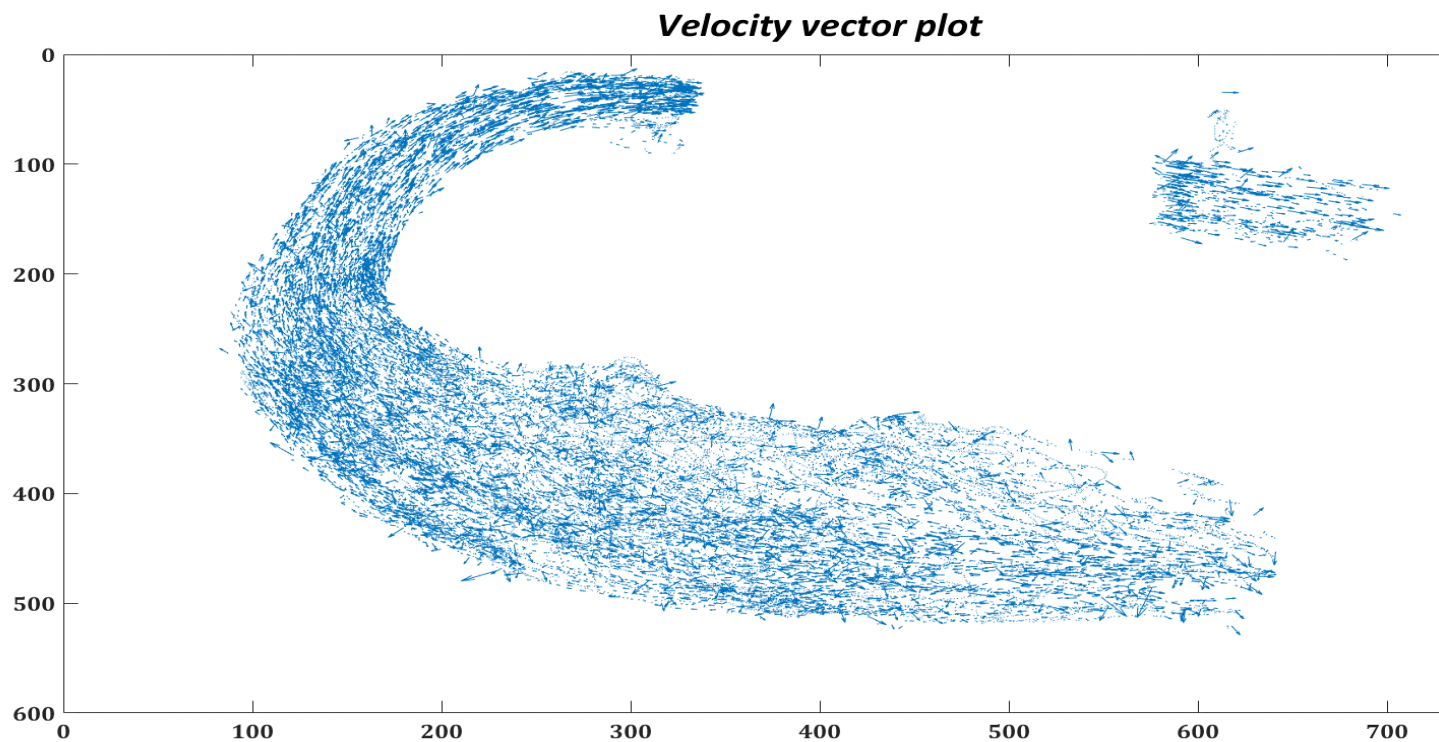

**Figure S6.** – Velocity vector plot of the tracked particles in the MPA conduit for patient 1 obtained from experimental trial 4.

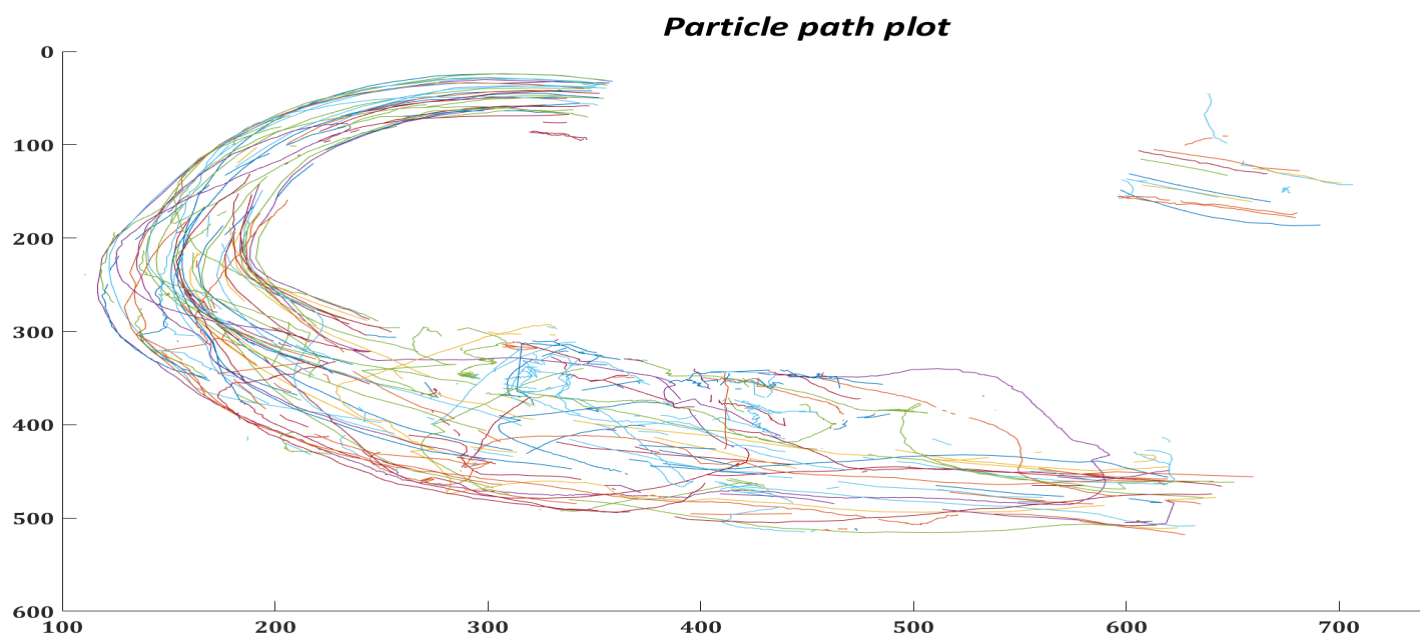

**Figure S7.** – The trajectory plot of tracked particles in the MPA conduit for patient 1 in experimental trial 5.



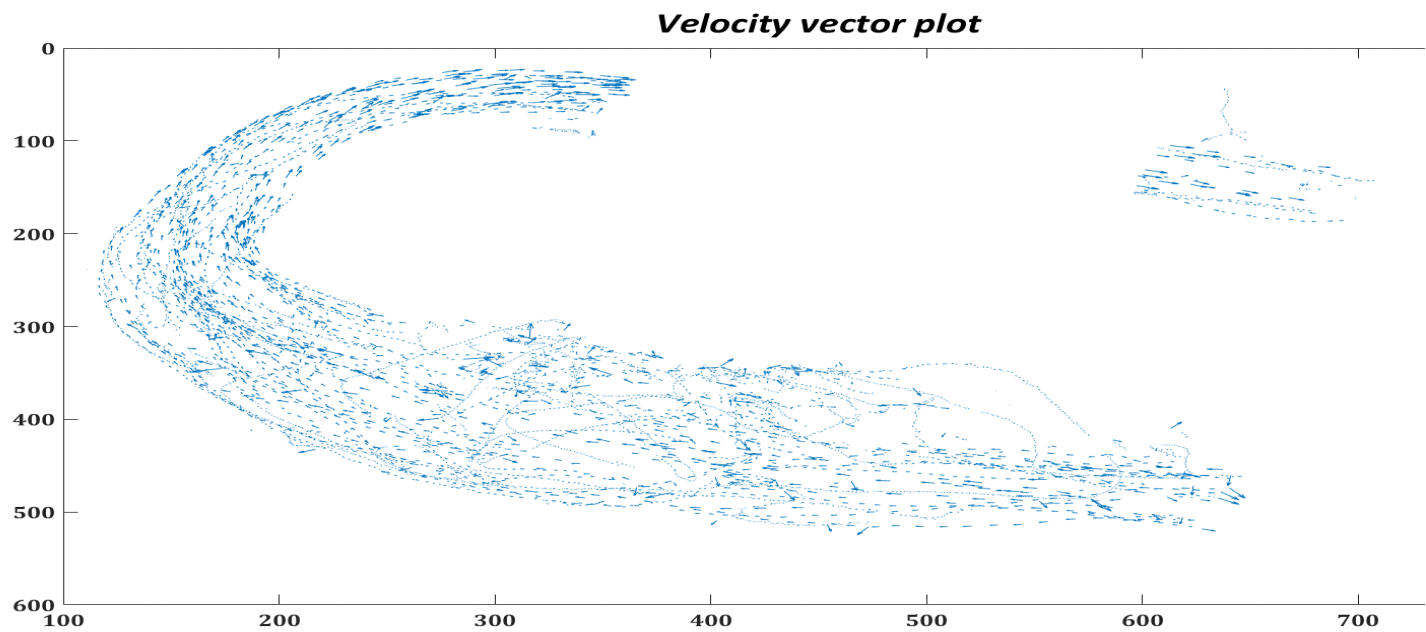

**Figure S8.** – Velocity vector plot of the tracked particles in the MPA conduit for patient 1 obtained from experimental trial 5.

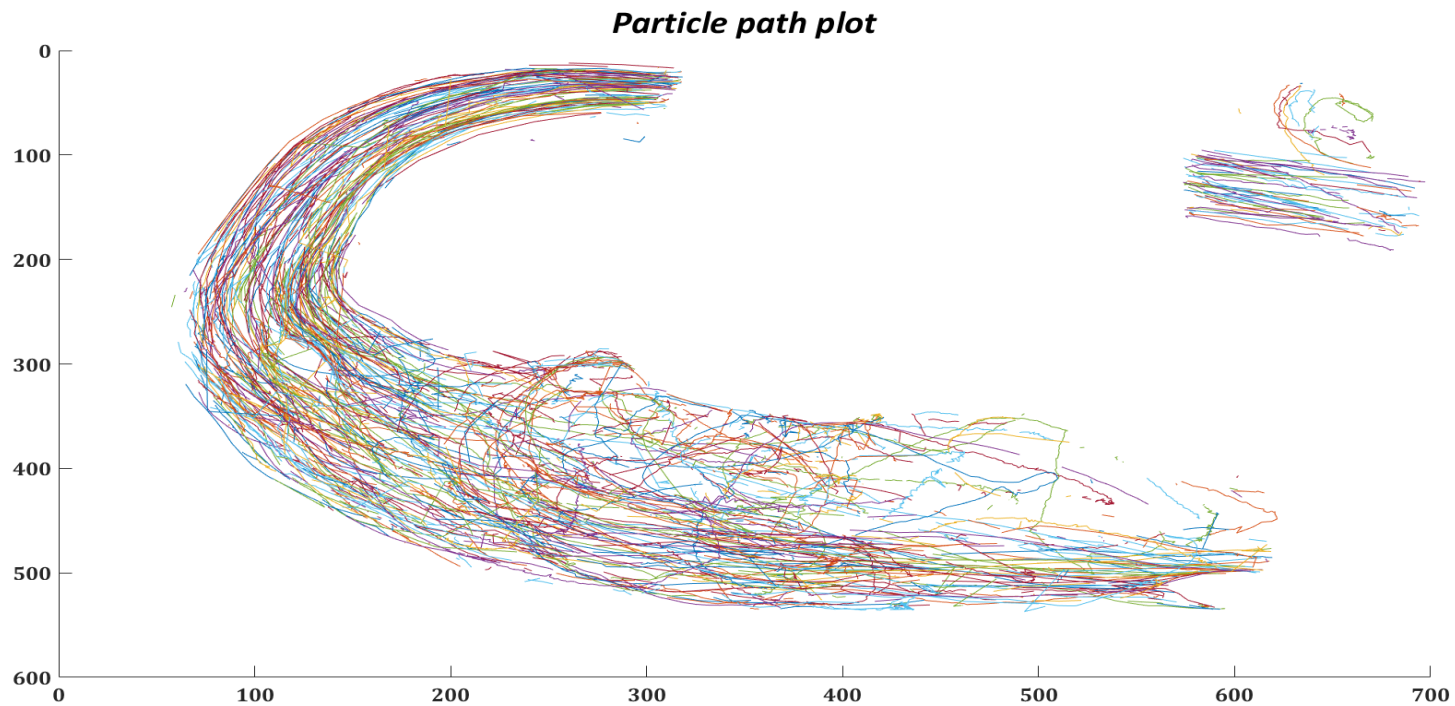

**Figure S9.** – The trajectory plot of tracked particles in the MPA conduit for patient 1 in experimental trial 6.

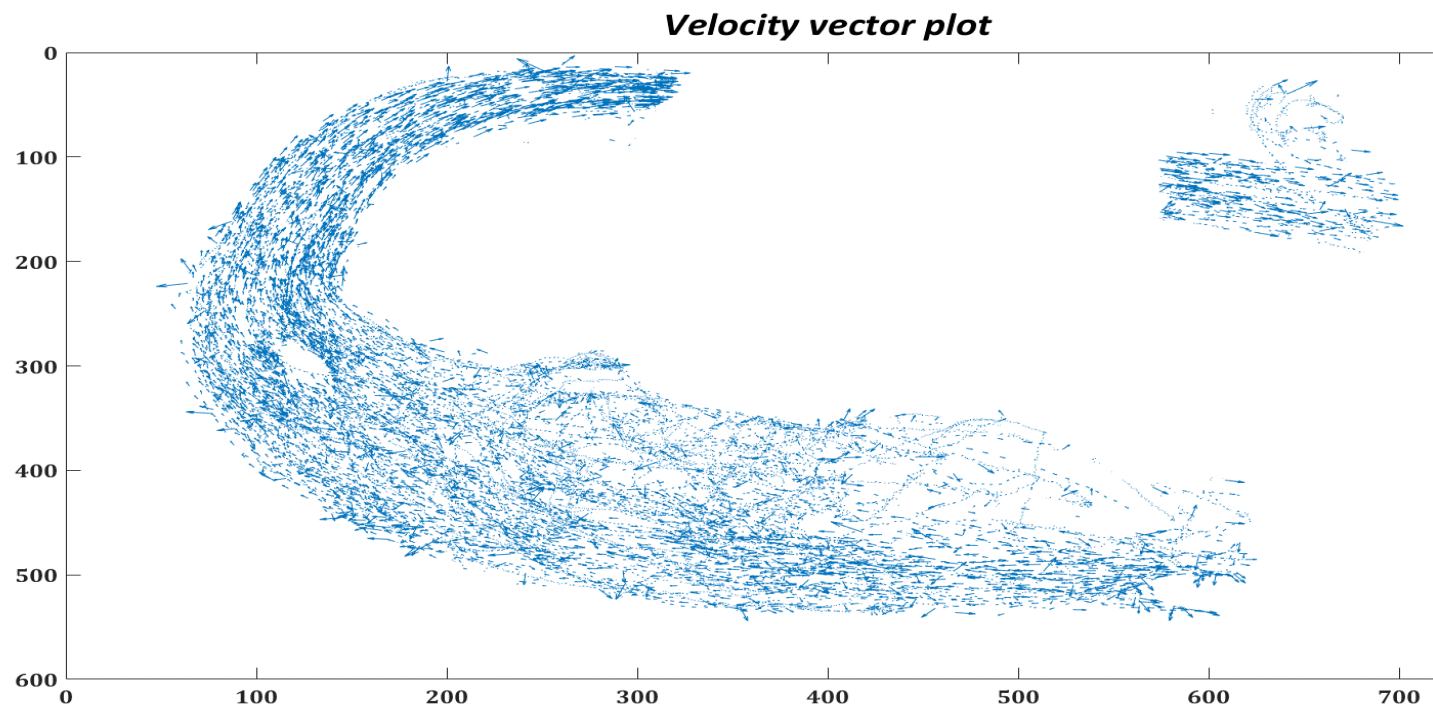

**Figure S10.** – Velocity vector plot of the tracked particles in the MPA conduit for patient 1 obtained from experimental trial 6.

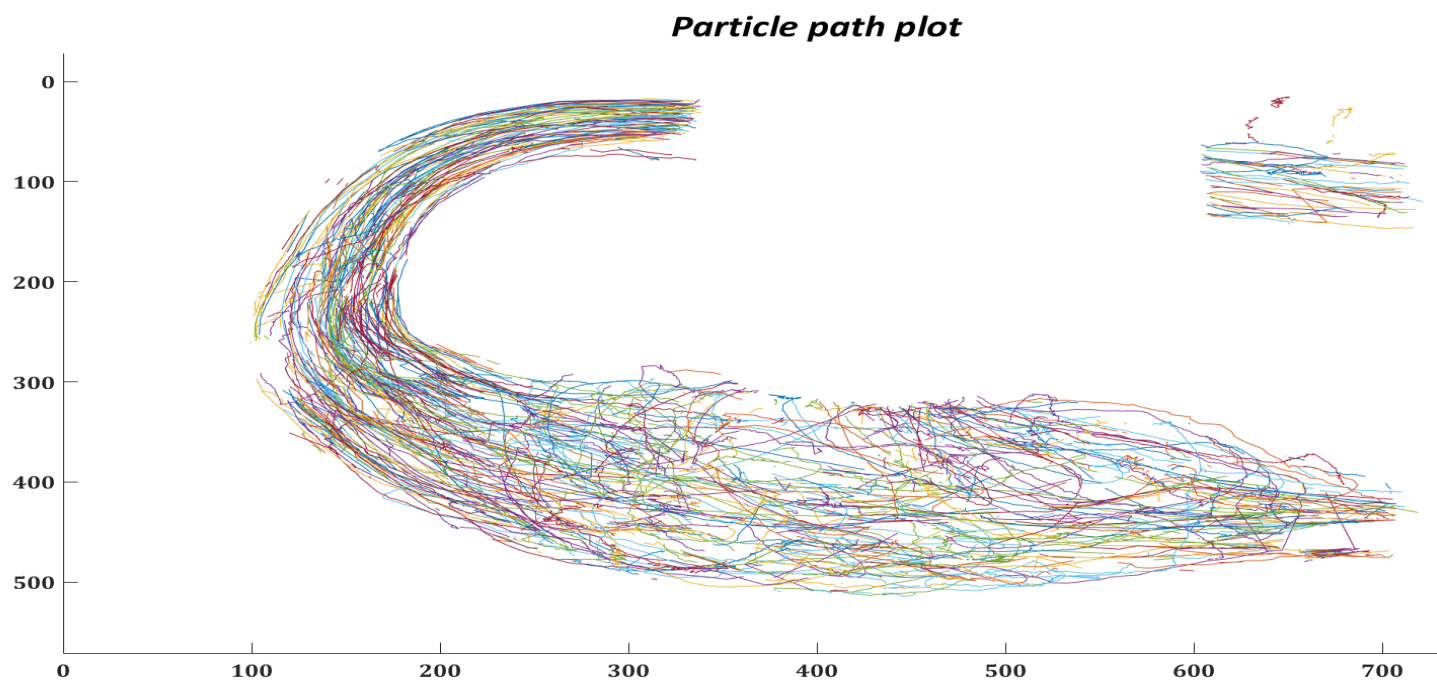

**Figure S11.** – The trajectory plot of tracked particles in the MPA conduit for patient 2 obtained from experimental trial 1.

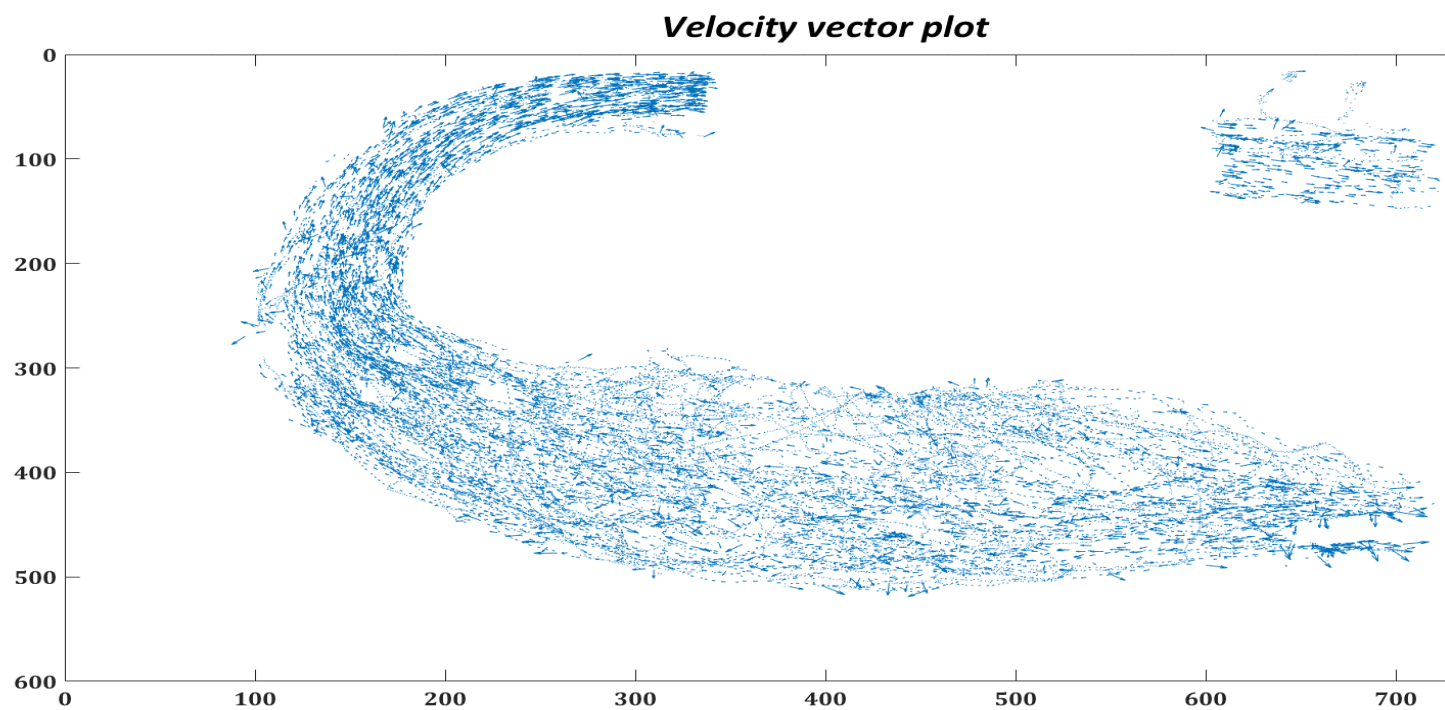

**Figure S12.** – Velocity vector plot of the tracked particles in the MPA conduit for patient 2 obtained from experimental trial 1.
